# Supplementary material for: Age-related changes in gut microbiota composition from newborn to centenarian: a cross-sectional study
Source: PubMed Central journal article supplement (PMC4879732; doi:10.1186/s12866-016-0708-5), 2016-05-25

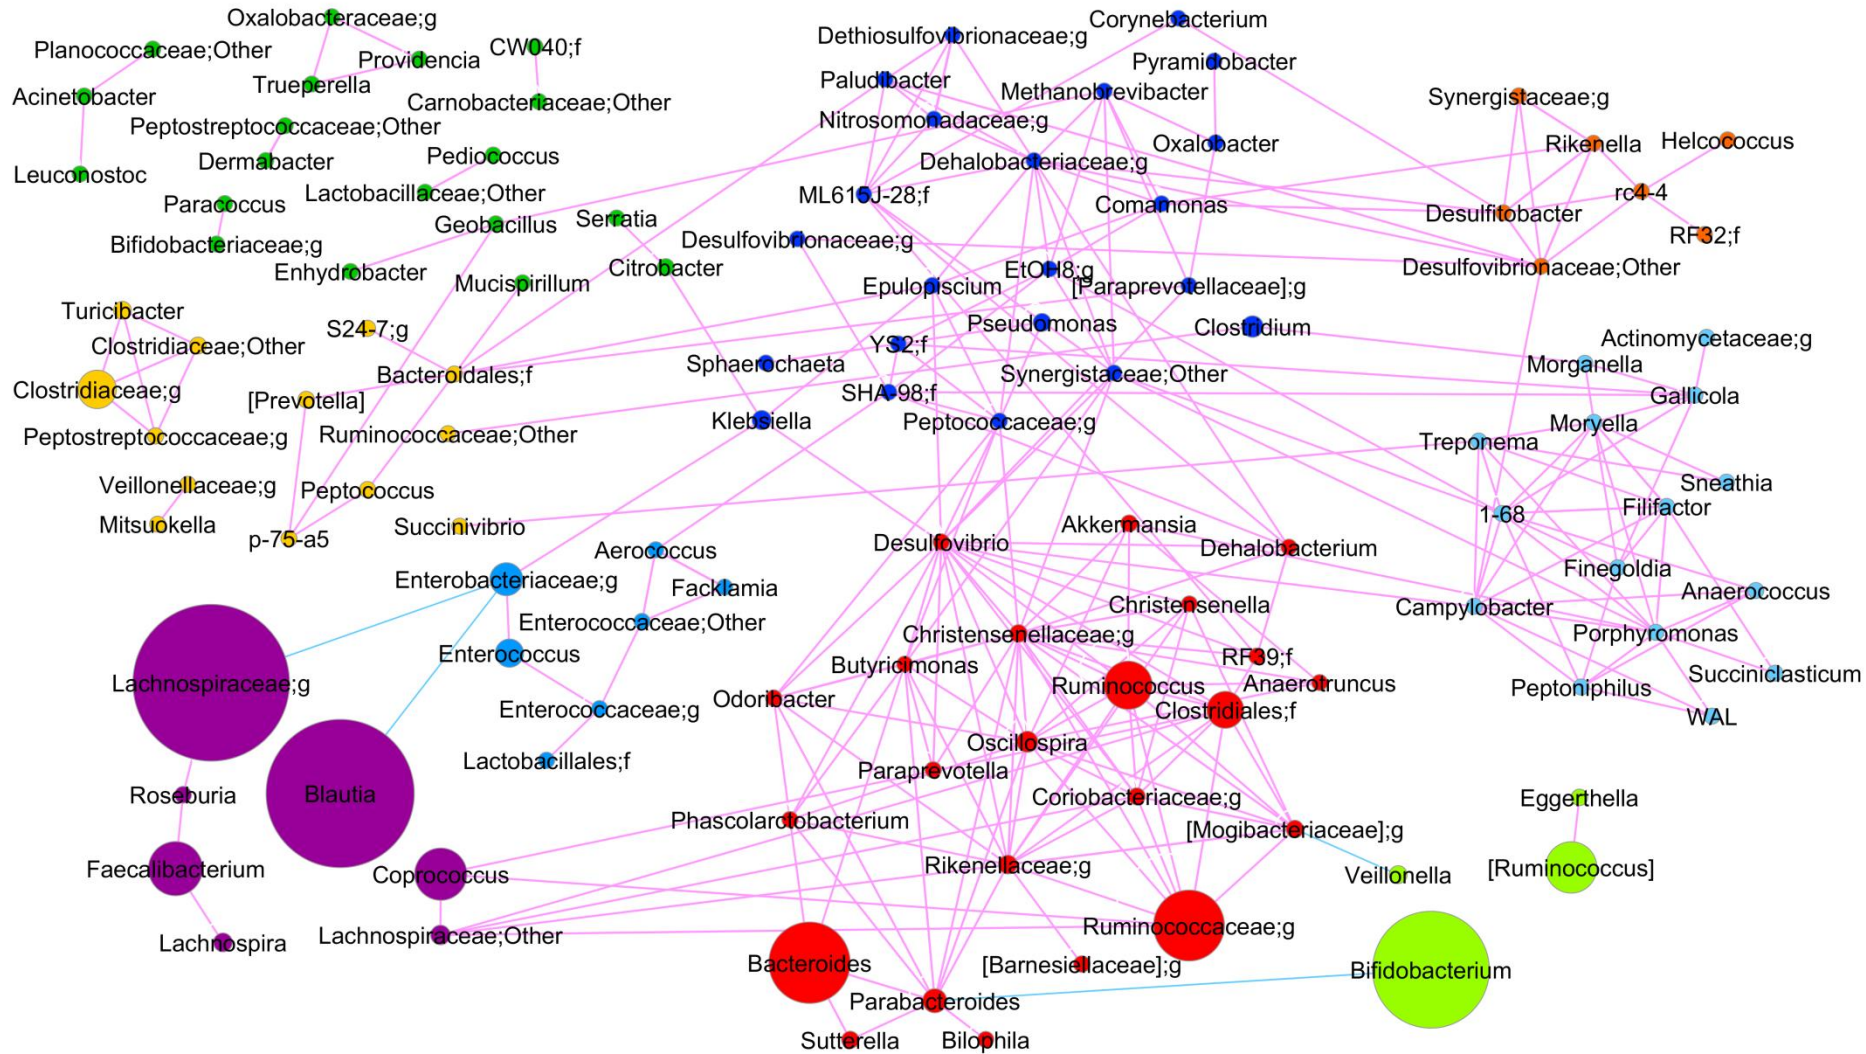

Supplement: 12866_2016_708_MOESM5_ESM.pdf [file 12866_2016_708_MOESM5_ESM.pdf]
